# Supplementary material for: Coating based on cellulose from oil palm empty fruit bunches and chitosan doped by Ag+: multivariate optimization and DFT analysis
Source: Royal Society of Chemistry journal article supplement (doi:10.1039/d3nj01988h), 2023-01-01
Supplement: d3nj01988h1.pdf [file d3nj01988h1.pdf]

**Supporting Information for:**

**Coating based on Cellulose from Oil Palm Empty Fruit  
Bunches and Chitosan Doped by Ag<sup>+</sup>: Multivariate  
Optimization and DFT Analysis**

Maulidan Firdaus<sup>a\*</sup>, Nurani Alawiyah<sup>a</sup>, Jeesica Hermayanti Pratama<sup>a</sup>, Achmad  
Nurul Yaqin<sup>b</sup>, Fajar Rakhman Wibowo<sup>a</sup>

*<sup>a</sup>Department of Chemistry, Faculty of Mathematics and Natural Sciences,  
Universitas Sebelas Maret*

*<sup>b</sup>Medical Department, Faculty of Medicine, Universitas Sebelas Maret  
Jl. Ir. Sutami 36A Surakarta 57126, Indonesia*

**\*Corresponding Author**

Maulidan Firdaus

Email: [maulidan@mipa.uns.ac.id](mailto:maulidan@mipa.uns.ac.id)

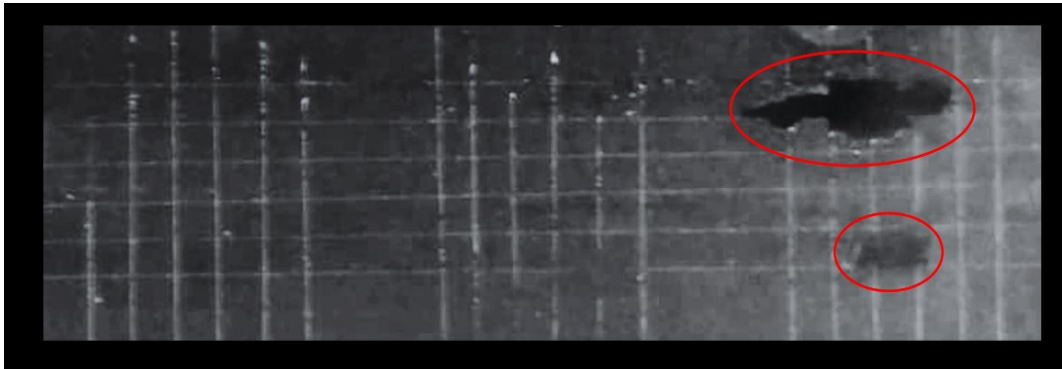

**Fig. S1** Representative results of the adhesive test

| Contact Angle                                                                      |                                                                                    |                                                                                     |
|------------------------------------------------------------------------------------|------------------------------------------------------------------------------------|-------------------------------------------------------------------------------------|
| 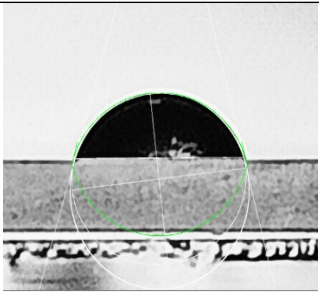 |  |  |
| 89°                                                                                | 93°                                                                                | 97°                                                                                 |
| <b>Average</b>                                                                     |                                                                                    | <b>93 ± 4°</b>                                                                      |

**Fig. S2** Average apparent contact angle of coating surface obtained with the goniometer camera

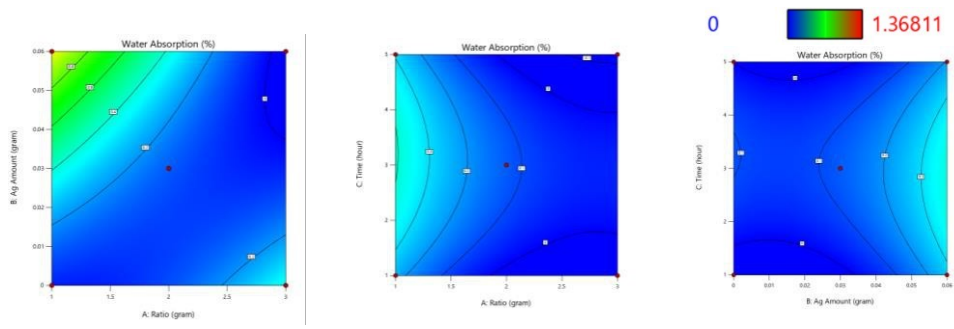

### Water Resistance Response

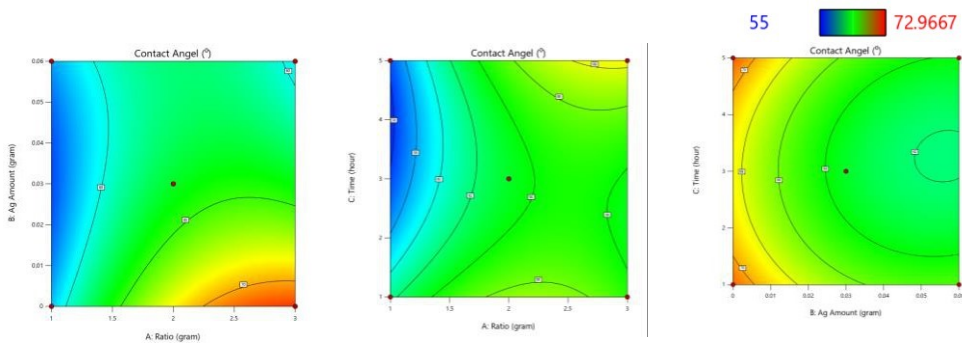

### Contact Angle Response

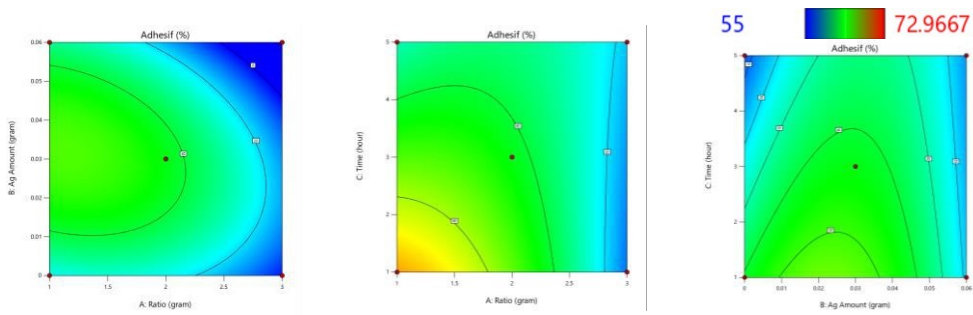

### Adhesive Strength Response

**Fig. S3** Graph plotting of independent variables on responses

**Table S1** Box-Behnken design parameter for coating material synthesis

| Set | Variable* |      |   | Variable code  |                |                | Response              |                      |                   |
|-----|-----------|------|---|----------------|----------------|----------------|-----------------------|----------------------|-------------------|
|     | A         | B    | C | X <sub>1</sub> | X <sub>2</sub> | X <sub>3</sub> | Adhesive strength (%) | Water absorption (%) | Contact angle (°) |
| F1  | 3         | 0.06 | 1 | +1             | +1             | -1             | 1.7                   | 0.1046               | 66.300            |
| F2  | 2         | 0    | 1 | 0              | -1             | -1             | 50.0                  | 0.0851               | 70.300            |
| F3  | 2         | 0.03 | 1 | 0              | 0              | -1             | 3.3                   | 0.0423               | 63.200            |
| F4  | 3         | 0    | 3 | +1             | -1             | 0              | 1.0                   | 0.0206               | 73.167            |
| F5  | 2         | 0    | 5 | 0              | -1             | +1             | 21.7                  | 0.2222               | 71.367            |
| F6  | 1         | 0    | 3 | -1             | -1             | 0              | 0.3                   | 0.0419               | 60.567            |
| F7  | 1         | 0.06 | 5 | -1             | +1             | +1             | 36.7                  | 0.1041               | 55.067            |
| F8  | 3         | 0.06 | 5 | +1             | +1             | +1             | 3.3                   | 0.0000               | 65.467            |
| F9  | 1         | 0.03 | 3 | -1             | 0              | 0              | 33.3                  | 1.3496               | 55.000            |
| F10 | 2         | 0.03 | 5 | 0              | 0              | +1             | 4.3                   | 0.0422               | 65.167            |
| F11 | 2         | 0.06 | 3 | 0              | +1             | 0              | 43.3                  | 0.1231               | 59.400            |
| F12 | 3         | 0.03 | 3 | +1             | 0              | 0              | 0.0                   | 0.0000               | 56.967            |
| F13 | 1         | 0.06 | 1 | -1             | +1             | -1             | 90.0                  | 0.1087               | 60.633            |

\*A = CNC/chitosan mixture (g); B = Ag amount (g); C = reaction time (hours)
